# Supplementary material
Source: publisher figshare collection journal article supplement (https://acs.figshare.com/ndownloader/files/10935221)
Supplement: Supplementary file 1 [file 10935221]

# Revisiting the Mechanism of Oxidative Unzipping of Multiwall Carbon Nanotubes to Graphene Nanoribbons—Supporting Information

Ayrat M. Dimiev,<sup>a\*</sup> Artur Khannanov,<sup>a</sup> Iskander Vakhitov,<sup>b</sup> Airat Kiiamov,<sup>a,b</sup> Ksenia Shukhina,<sup>a</sup>  
and James M. Tour<sup>c\*</sup>

<sup>a</sup>Laboratory for Advanced Carbon Nanomaterials, Kazan Federal University, and <sup>b</sup>Institute of Physics, Kazan Federal University, Kremlyovskaya str. 18, Kazan 420008, Russian Federation;

<sup>c</sup>Departments of Chemistry and Materials Science and NanoEngineering, Smalley-Curl Institute and the NanoCarbon Center, Rice University, 6100 Main Street, Houston, Texas, 77005, USA

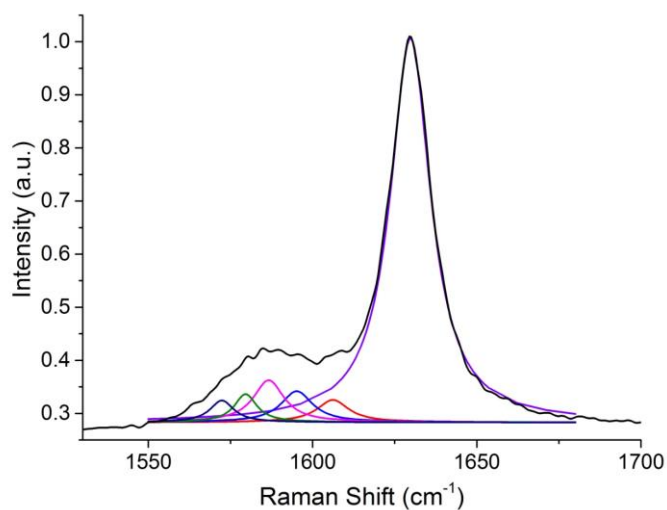

**Figure S1.** The G-band of the Raman spectrum of MWCNTs in the  $\text{KMnO}_4/\text{H}_2\text{SO}_4$  solution at 0.06 wt equiv of  $\text{KMnO}_4$ . Black line is the experimental envelop spectrum. Colored lines are the

constituent components. The purple peak centered at  $1630\text{ cm}^{-1}$  is from the stage-1  $\text{H}_2\text{SO}_4$ -GIC. The red line component at  $1608\text{ cm}^{-1}$  is assigned to the stage-2 GIC.

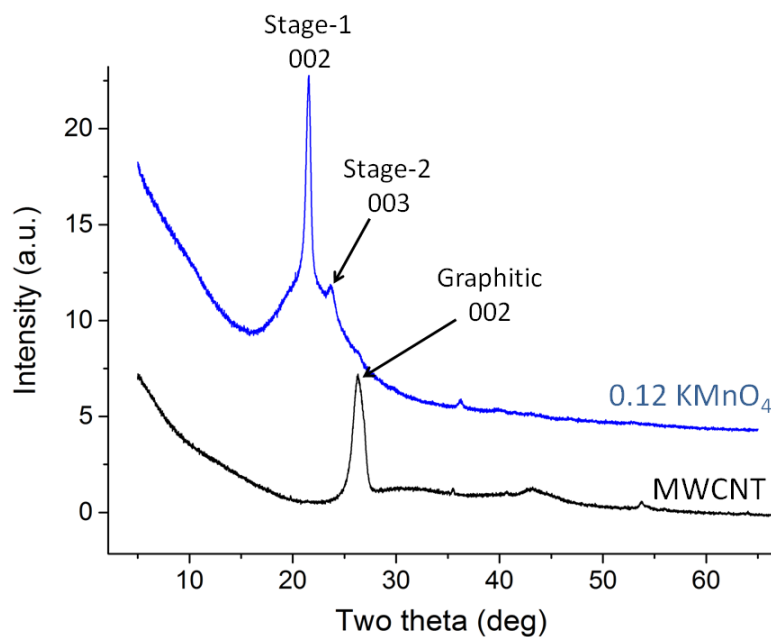

**Figure S2.** Powder X-ray diffraction pattern for MWCNTs while in the acidic mixture at the 0.12  $\text{KMnO}_4/\text{MWCNT}$  ratio.

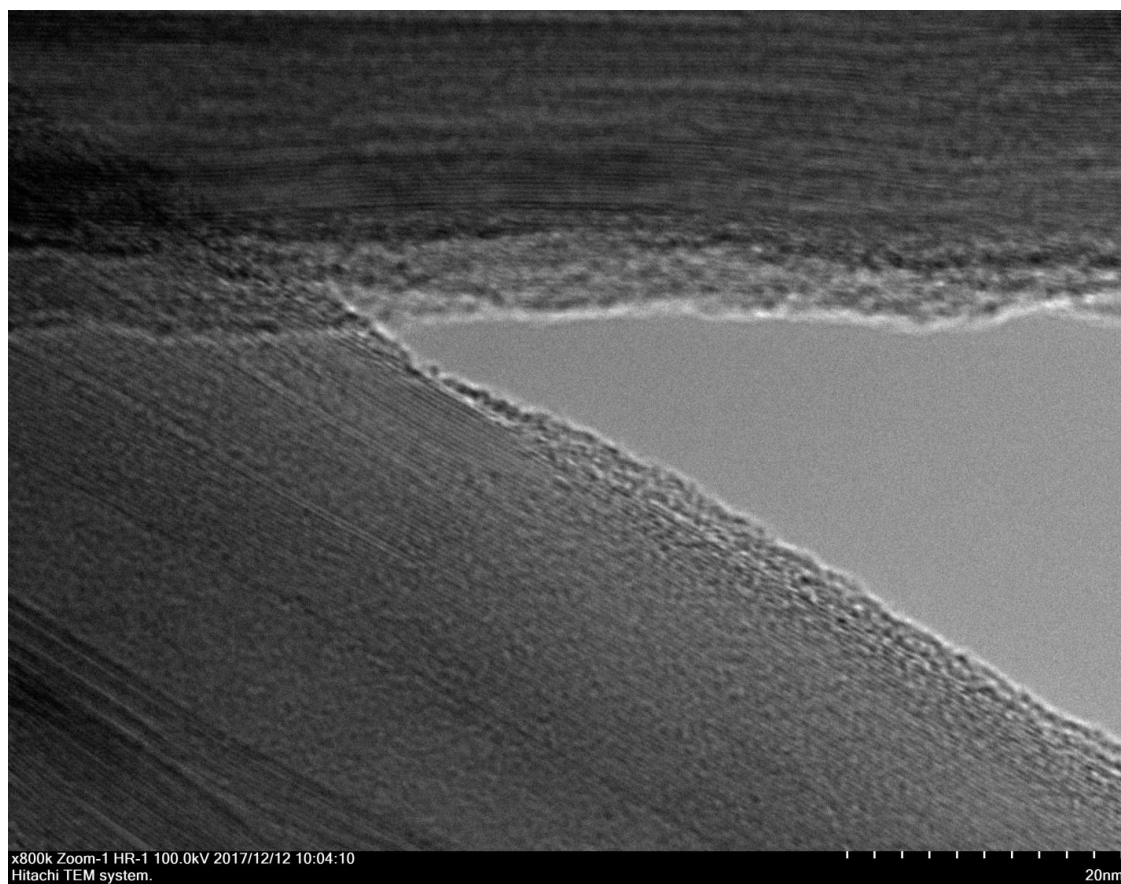

**Figure S3.** TEM image of pristine MWCNTs.

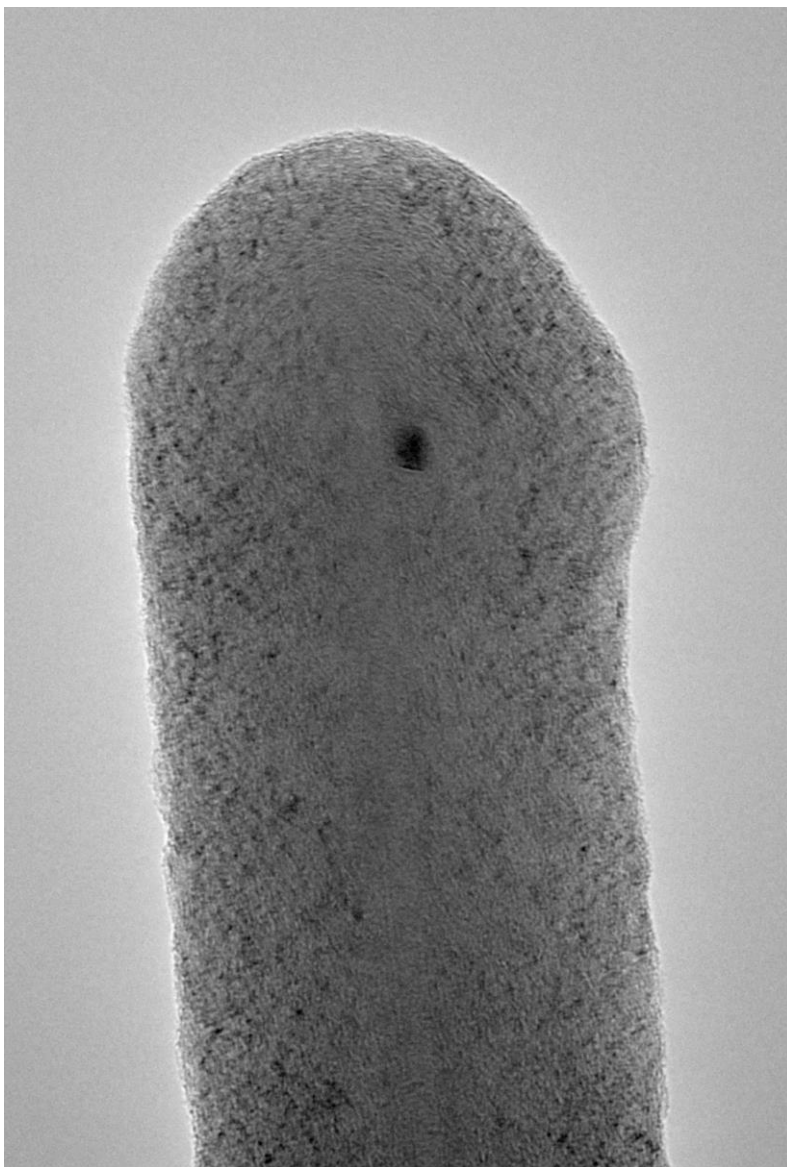

**Figure S4.** TEM image of the capped end of pristine MWCNT. Acquired at magnification 200k.

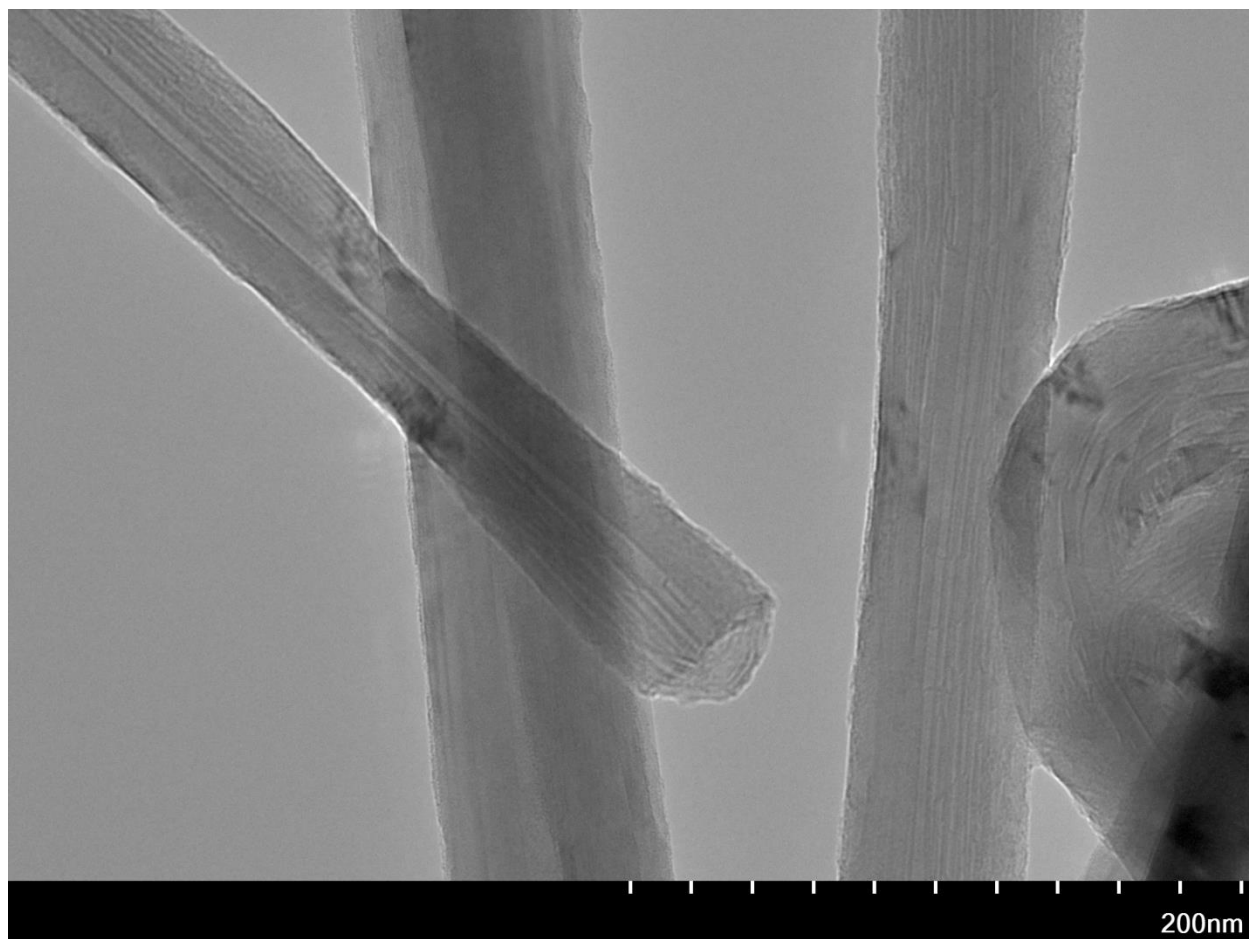

**Figure S5.** TEM image of the opened end of pristine MWCNT.

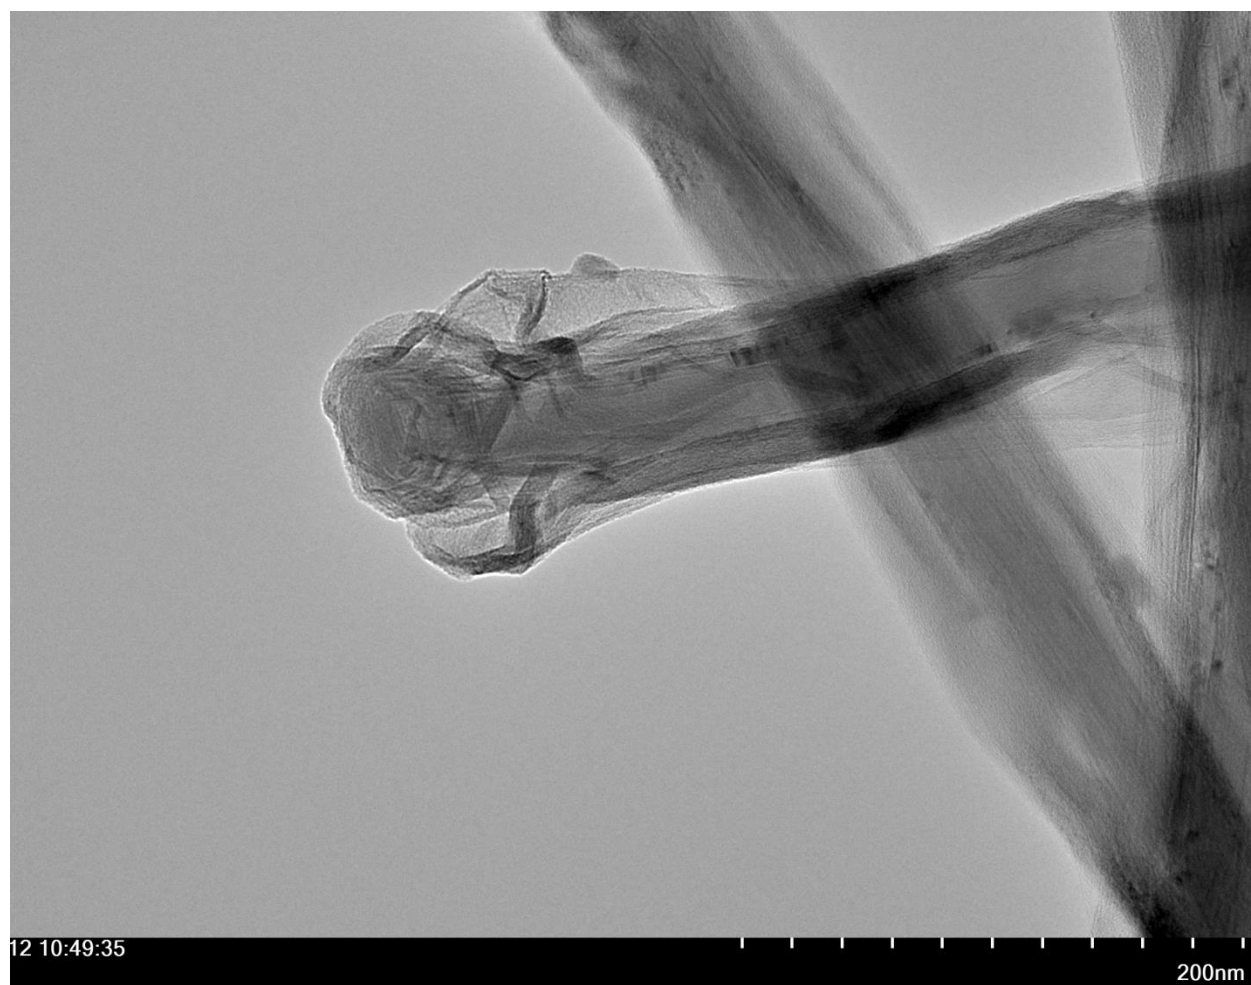

**Figure S6.** The TEM image of the uncapped end of the intercalated-unzipped MWCNT. Intercalation-unzipping begins from this end.
